# Supplementary material for: Multiplexed editing of a begomovirus genome restricts escape mutant formation and disease development
Source: PubMed Central journal article supplement (PMC6808502; doi:10.1371/journal.pone.0223765), 2019-10-23

Image File for Gels

Fig 2 a

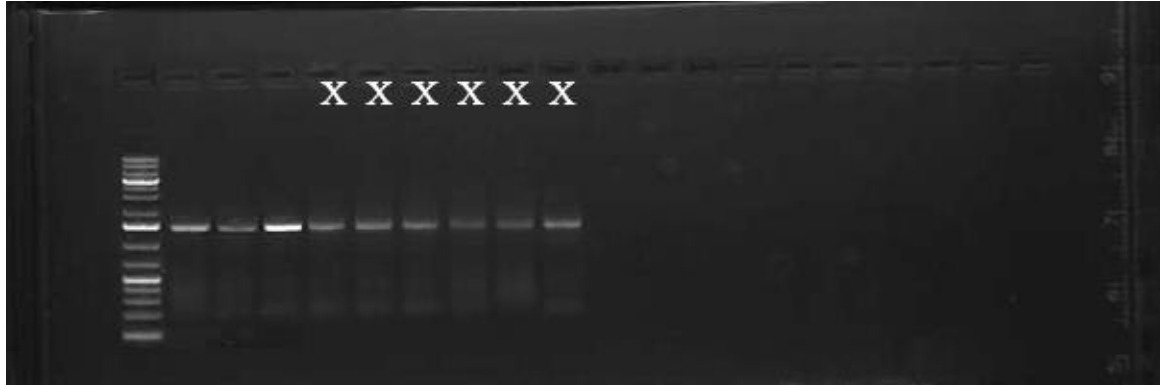

Fig 2 b

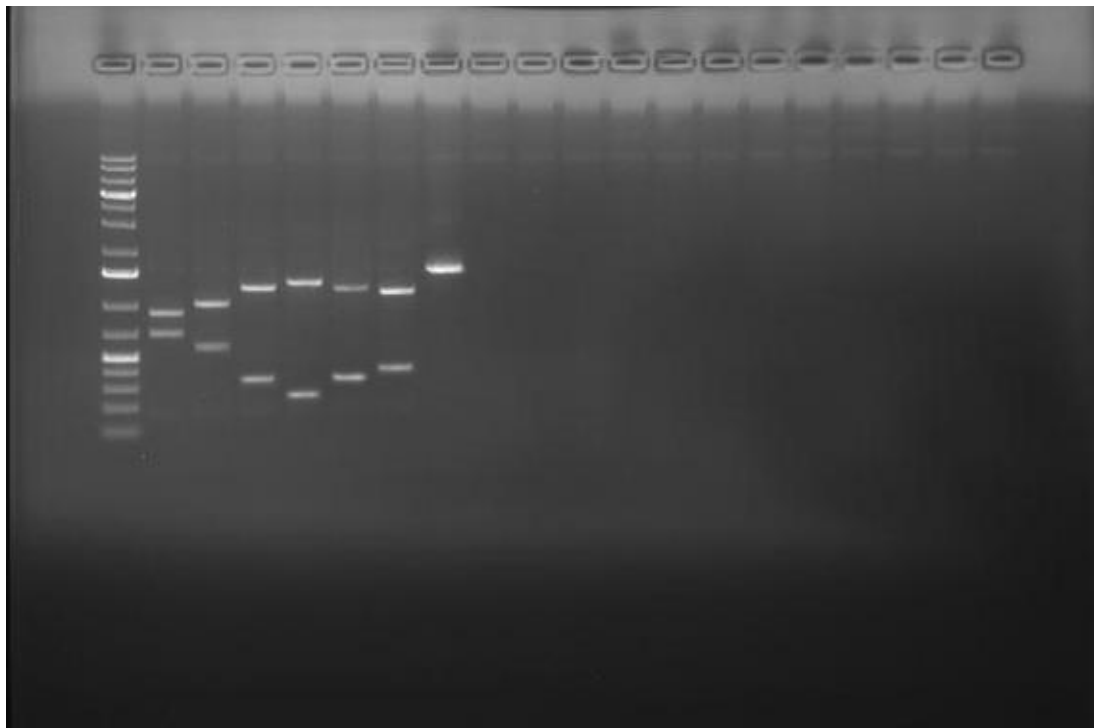

Fig 2 c

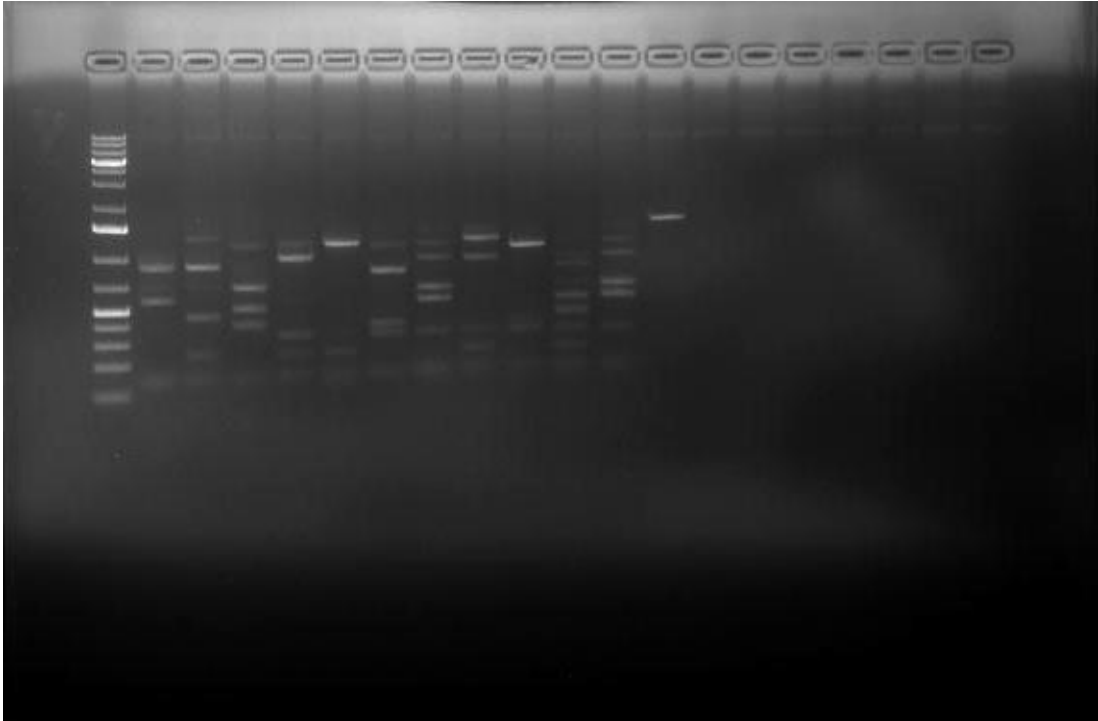

Fig 4 d

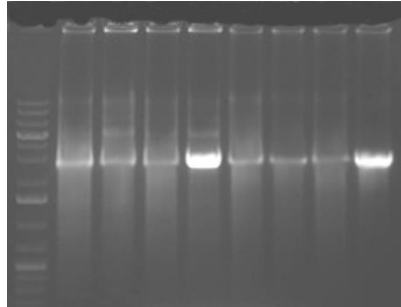

Fig 5 a

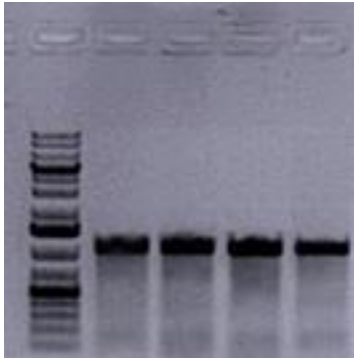

Fig 5 b

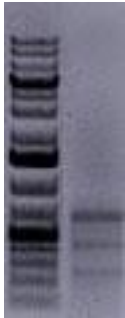

Supplement: pone.0223765.s001.pdf [file pone.0223765.s001.pdf]
